# Supplementary material for: Ingenious construction of an electrochemical aptasensor based on a Au@COF/GO-NH2 composite with excellent detection performance
Source: Royal Society of Chemistry journal article supplement (doi:10.1039/d1tc00319d), 2021-01-01
Supplement: d1tc00319d1.pdf [file d1tc00319d1.pdf]

## Supplementary Information

### **Ingenious construction of an electrochemical aptasensor based on an Au@COF/GO-NH<sub>2</sub> composite with excellent detection performance**

Zhang-Ye Han,<sup>a</sup> Hao Zhang,<sup>b</sup> Hong-Kai Li,<sup>a</sup> Qian-Qian Zhu,<sup>a</sup> and Hongming He<sup>\*a</sup>

<sup>a</sup> *Tianjin Key Laboratory of Structure and Performance for Functional Molecules, College of Chemistry, Tianjin Normal University, Tianjin 300387, China*

<sup>b</sup> *Tianjin University of Technology and Education, Tianjin 300222, China*

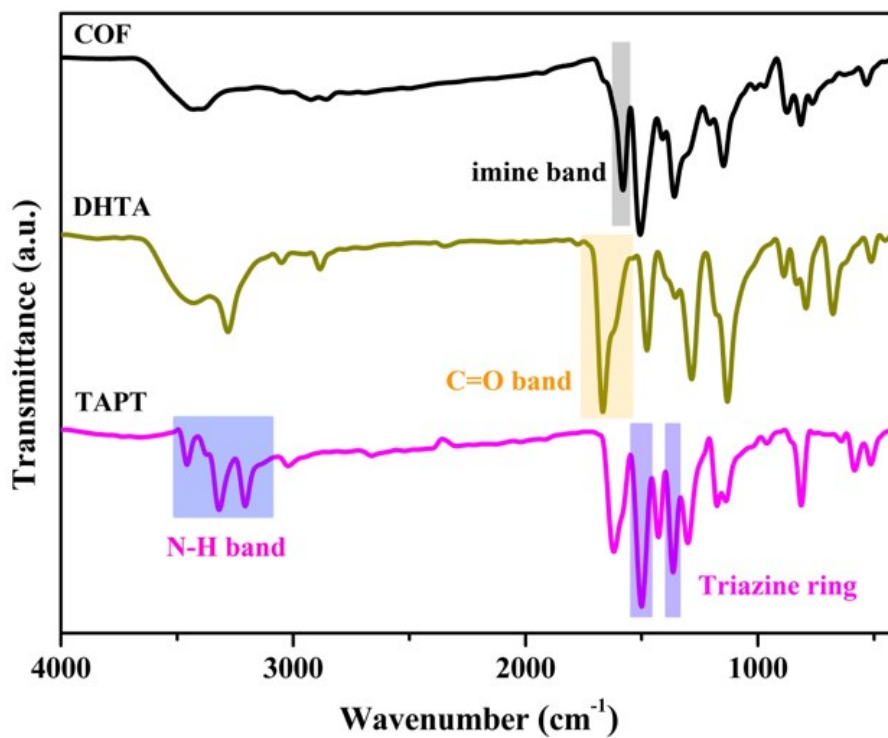

**Figure S1.** The FT-IR spectra of TAPT, DHTA and COF.

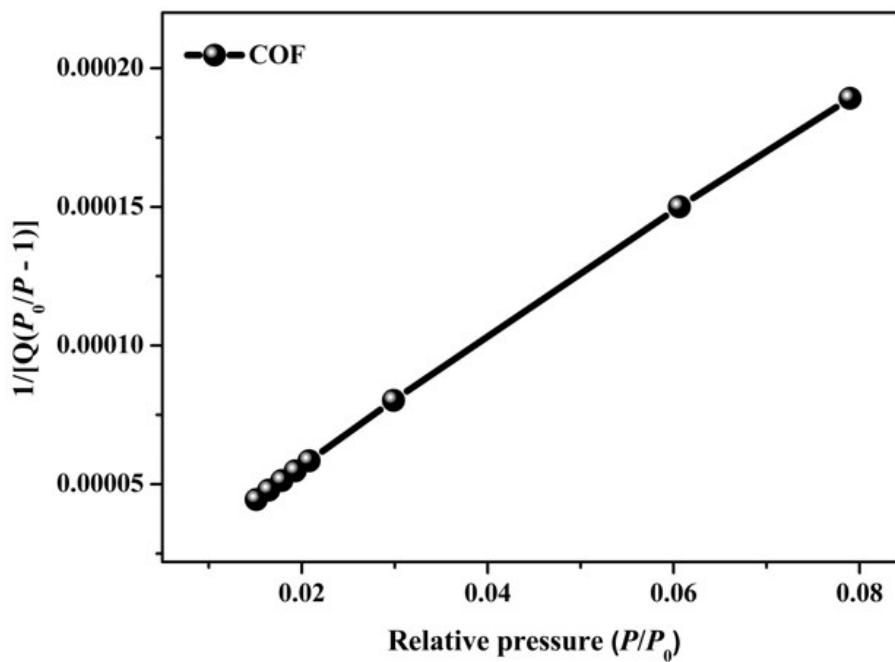

**Figure S2.** The BET surface area plots of COF.

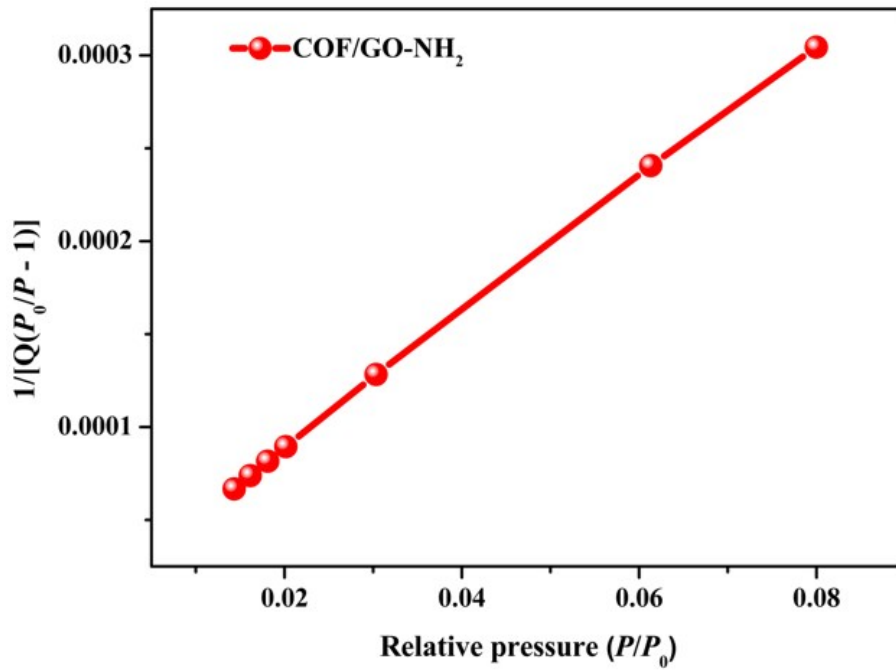

**Figure S3.** The BET surface area plots of COF/GO-NH<sub>2</sub>.

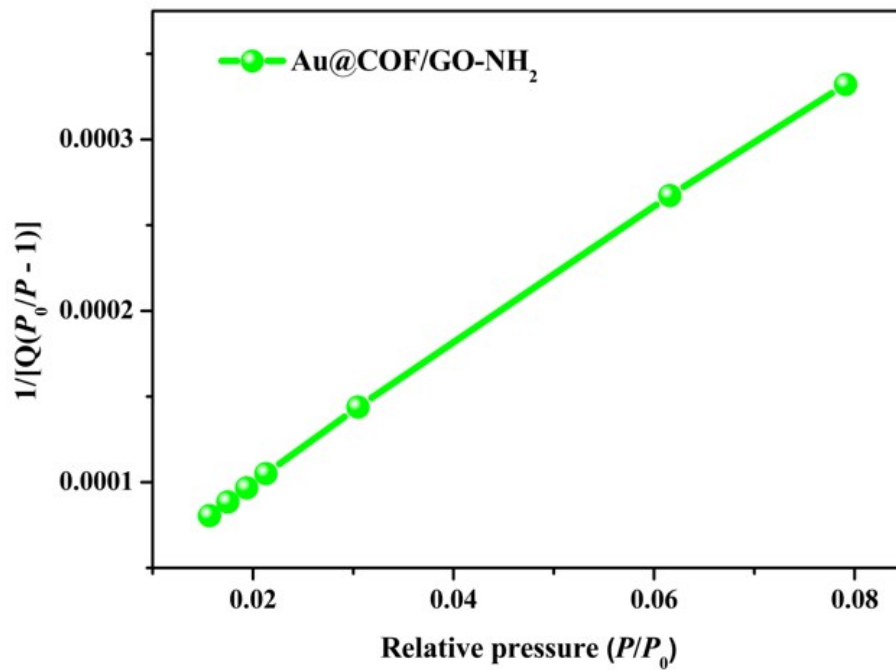

**Figure S4.** The BET surface area plots of Au@COF/GO-NH<sub>2</sub>.

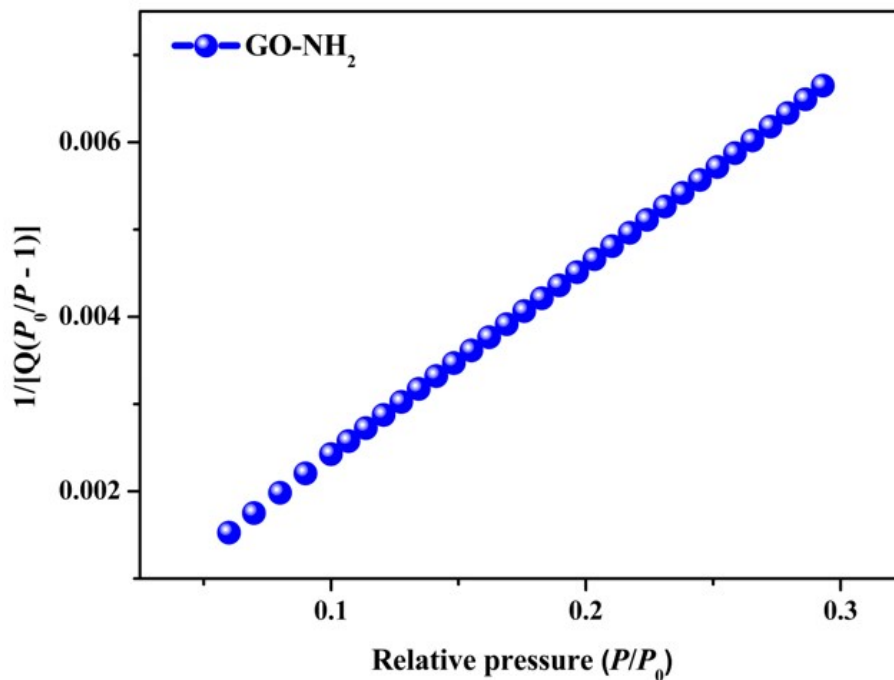

**Figure S5.** The BET surface area plots of GO-NH<sub>2</sub>.

**Table S1** BET surface area reports of COF, COF/GO-NH<sub>2</sub>, Au@COF/GO-NH<sub>2</sub> and GO-NH<sub>2</sub>.

| Material                  | BET (m <sup>2</sup> g <sup>-1</sup> ) | Slope (g cm <sup>-3</sup> ) | Y-Intercept (g cm <sup>-3</sup> ) | C          | Qm (cm <sup>3</sup> g <sup>-1</sup> ) | Correlation Coefficient |
|---------------------------|---------------------------------------|-----------------------------|-----------------------------------|------------|---------------------------------------|-------------------------|
| COF                       | 1907.6188 ± 13.5801                   | 0.002271 ± 0.000016         | 0.000011 ± 0.000001               | 206.537959 | 438.2733                              | 0.9998468               |
| COF/GO-NH <sub>2</sub>    | 1193.8422 ± 8.9494                    | 0.003630 ± 0.000027         | 0.000016 ± 0.000001               | 226.091804 | 274.2839                              | 0.9998585               |
| Au@COF/GO-NH <sub>2</sub> | 1089.2801 ± 9.7638                    | 0.003976 ± 0.000036         | 0.000020 ± 0.000002               | 200.119683 | 250.2609                              | 0.9997975               |
| GO-NH <sub>2</sub>        | 197.5045 ± 0.2251                     | 0.021802 ± 0.000025         | 0.000236 ± 0.000005               | 93.408035  | 45.3764                               | 0.9999802               |

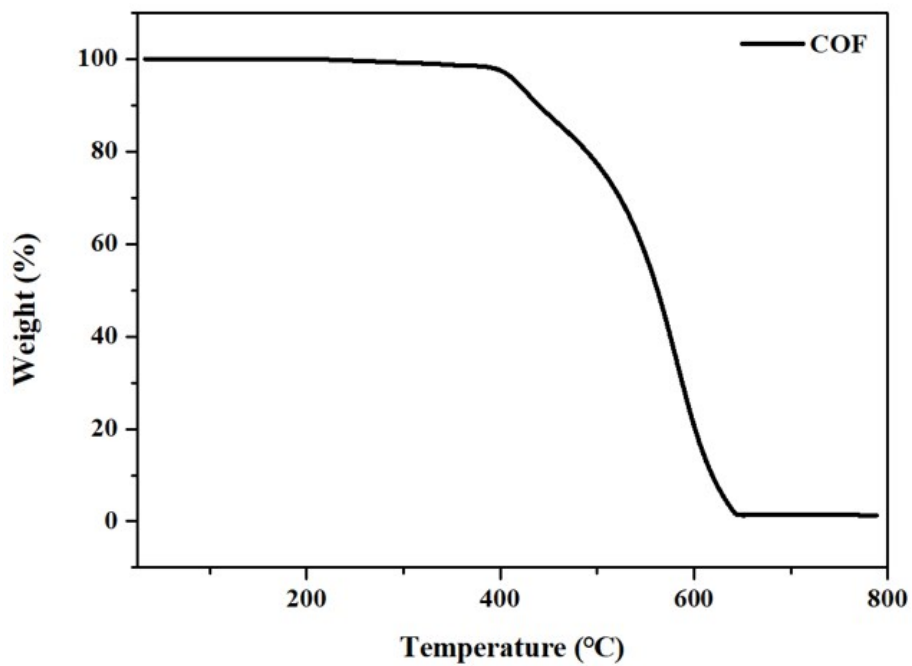

**Figure S6.** The TGA curve of COF.

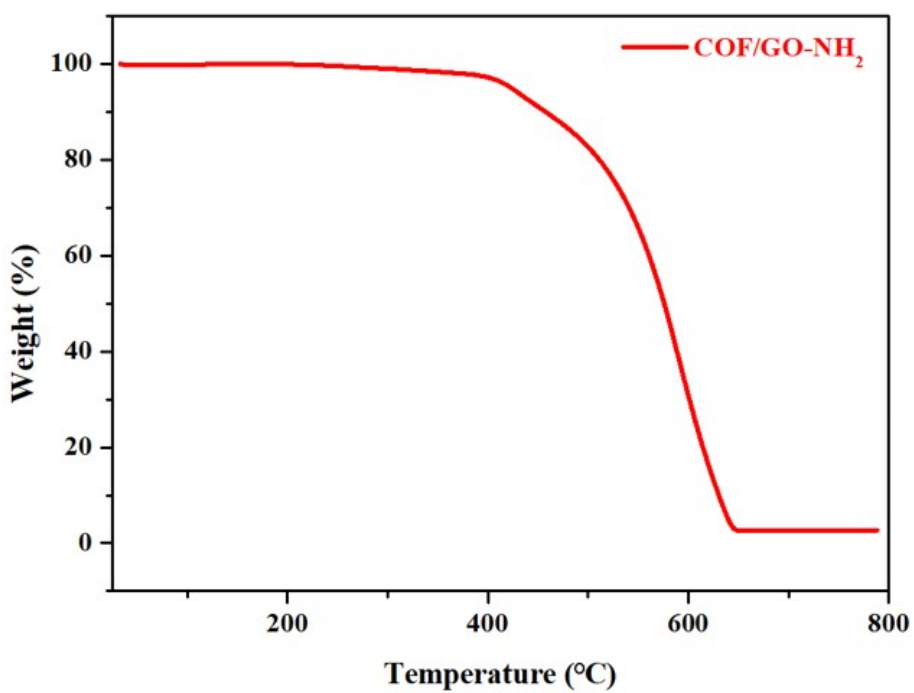

**Figure S7.** The TGA curve of COF/GO-NH<sub>2</sub>.

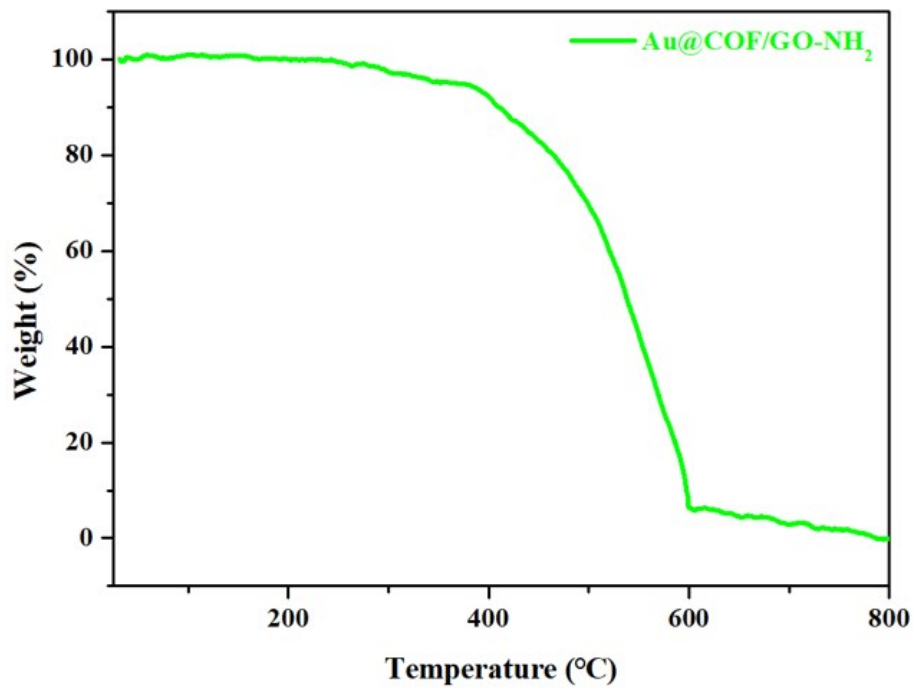

**Figure S8.** The TGA curve of Au@COF/GO-NH<sub>2</sub>.

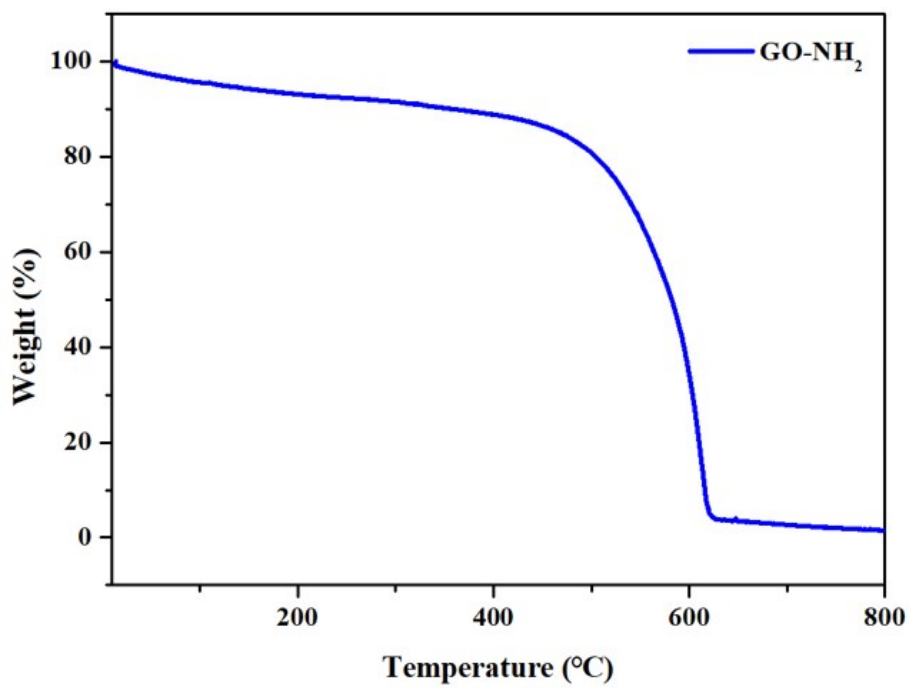

**Figure S9.** The TGA curve of GO-NH<sub>2</sub>.

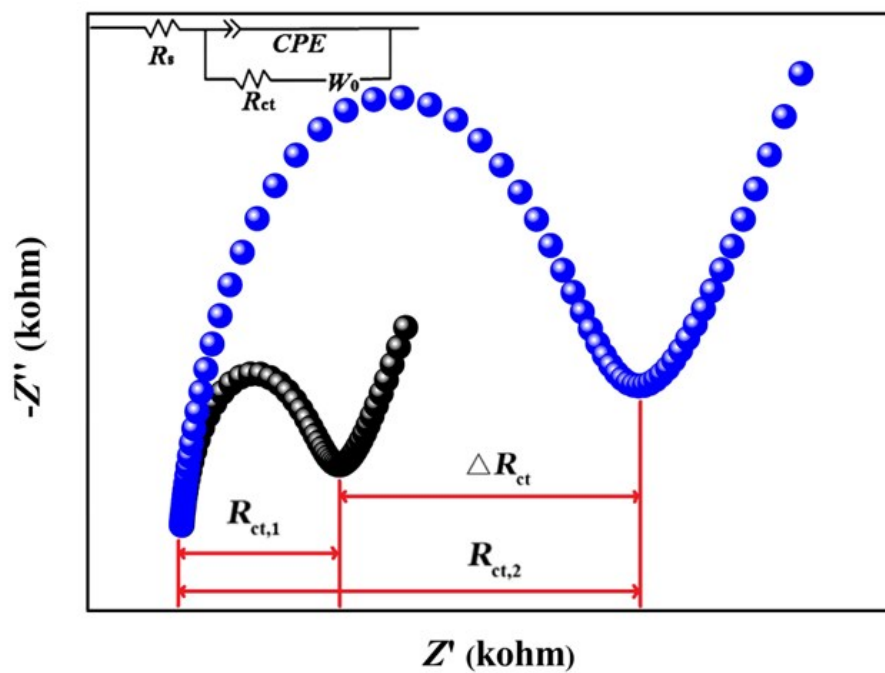

Figure S10. EIS Nyquist plots with the equivalent circuit.

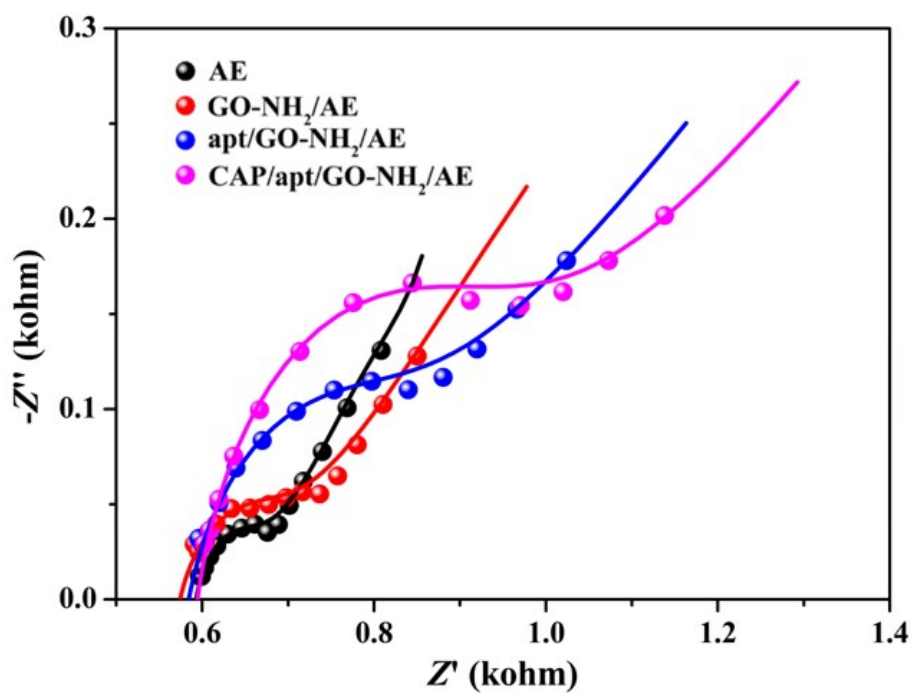

Figure S11. EIS Nyquist plots of the fabricated aptasensor based on GO-NH<sub>2</sub> at each stage.

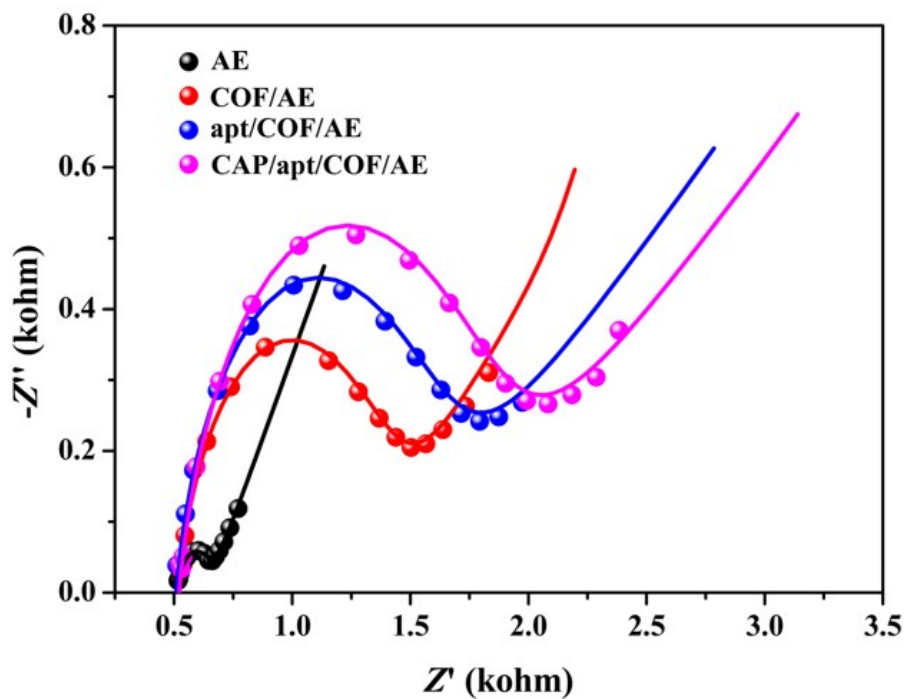

**Figure S12.** EIS Nyquist plots of the fabricated aptasensor based on COF at each stage.

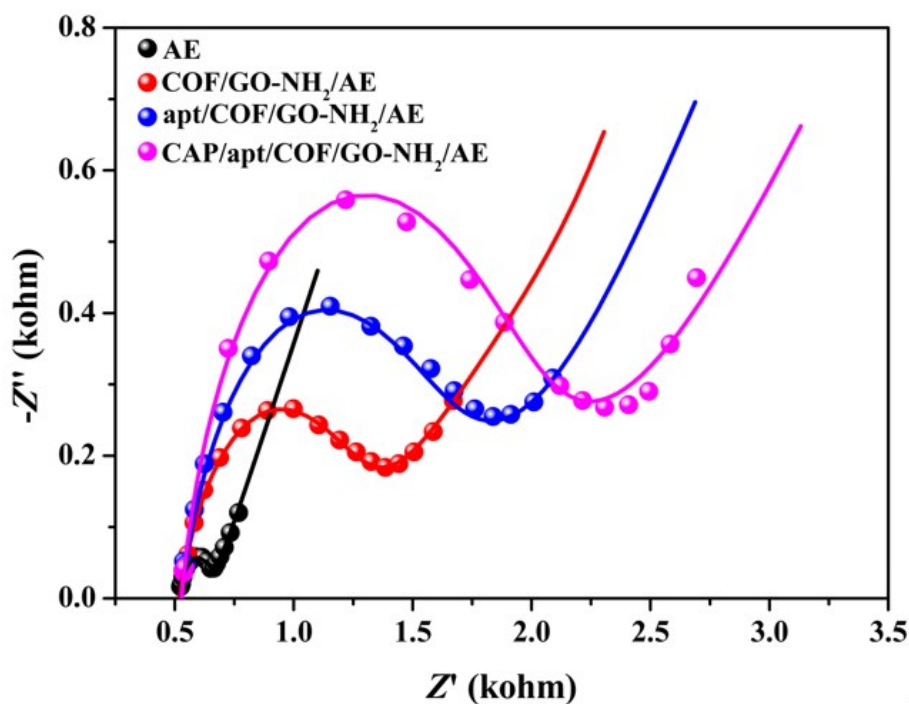

**Figure S13.** EIS Nyquist plots of the fabricated aptasensor based on COF/GO-NH<sub>2</sub> at each stage.



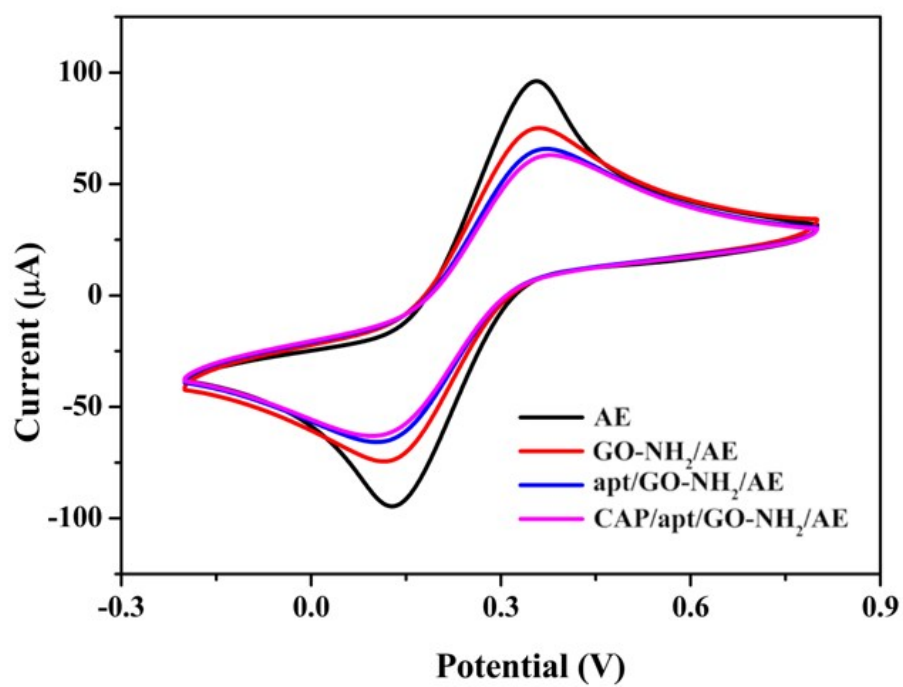

**Figure S14.** CV curves of the fabricated aptasensor based on GO-NH<sub>2</sub> at each stage.

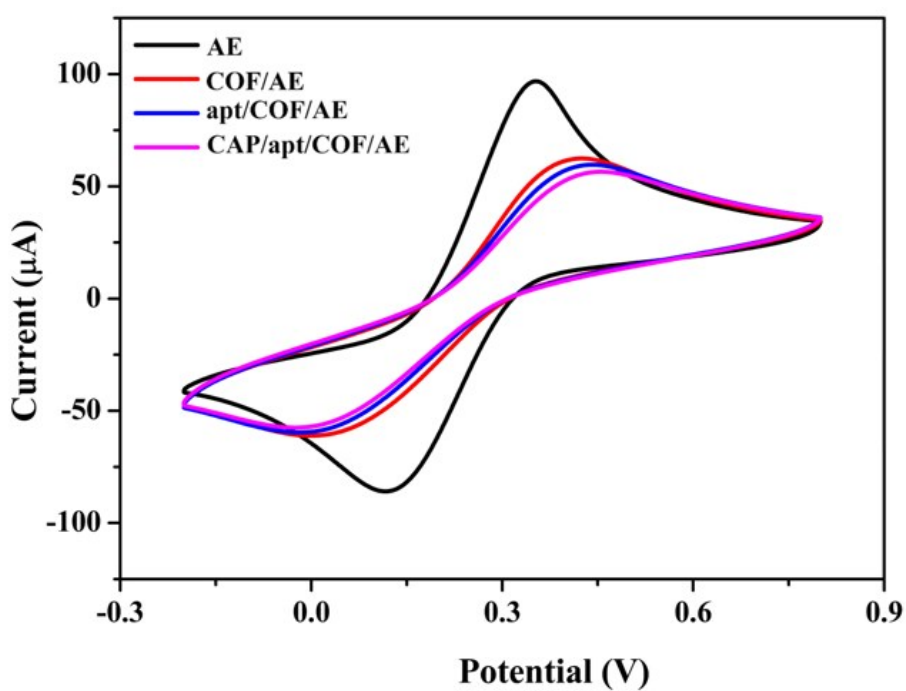

**Figure S15.** CV curves of the fabricated aptasensor based on COF at each stage.

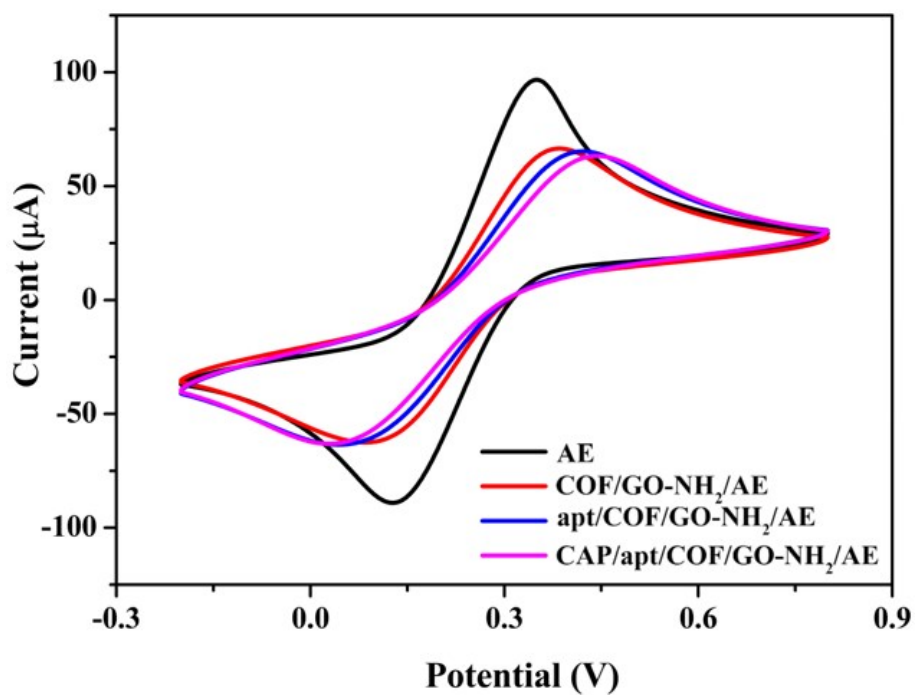

**Figure S16.** CV curves of the fabricated aptasensor based on COF/GO-NH<sub>2</sub> at each stage.

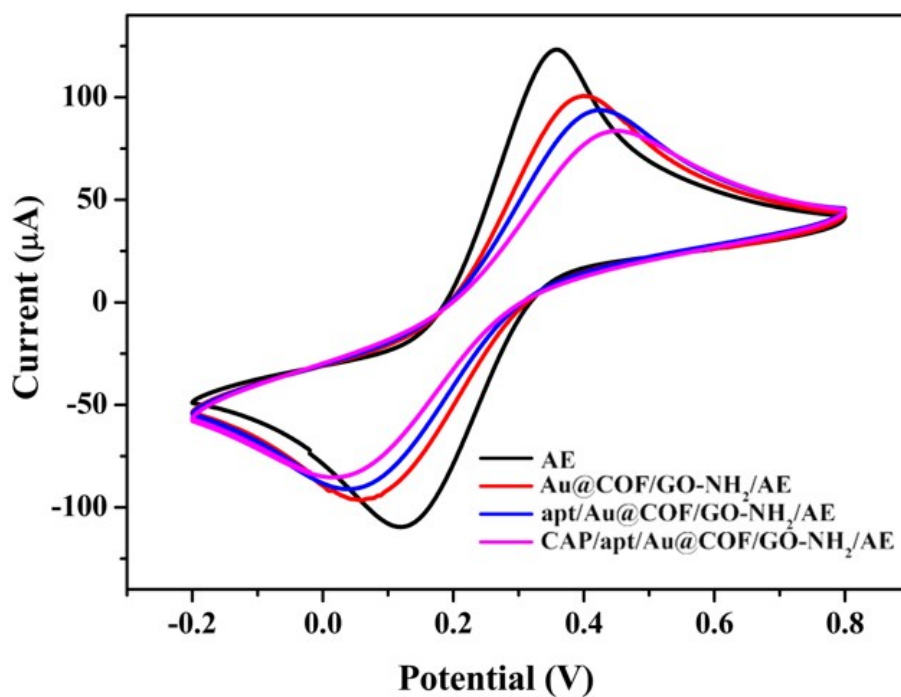

**Figure S17.** CV curves of the fabricated aptasensor based on Au@COF/GO-NH<sub>2</sub> at each stage.
